# Supplementary material for: Unique fractal evaluation and therapeutic implications of mitochondrial morphology in malignant mesothelioma
Source: PubMed Central journal article supplement (PMC4832330; doi:10.1038/srep24578), 2016-04-15

## **Unique fractal evaluation and therapeutic implications of mitochondrial morphology in malignant mesothelioma**

Frances E Lennon, Gianguido C Cianci, Rajani Kanteti, Jacob J Riehm, Qudsia Arif, Valeriy A Poroyko, Eitan Lupovitch, Wickii Vigneswaran, Aliya Husain, Phetcharat Chen, James K Liao, Martin Sattler, Hedy L Kindler, Ravi Salgia

### **Supplemental Data**

#### **Supplemental Figure 1. Fractal Dimension and Lacunarity analysis of duplicate tumor samples.**

Fractal dimension and lacunarity were measured for duplicate samples from control hyperplasia/benign, biphasic and epithelioid mesothelioma samples as technical replicates. Results were analyzed via two-way repeated measures ANOVA. No significant variation was detected between the duplicate samples in any of the subtypes.

#### **Supplemental Figure 2. ROC Analysis of Fractal dimension classifier**

ROC analysis was carried out on fractal dimension for a) biphasic and b) epithelioid mesothelioma samples.

#### **Supplemental Figure 3. ROC Analysis of Lacunarity classifier.**

ROC analysis was carried out on lacunarity for a) biphasic and b) epithelioid mesothelioma samples.

**Supplemental Figure 4. Scatter plots of OCR and ECAR with inhibitor EC50 values.**

Scatter plots of a)OCR, b)ECAR with EC50 values for cisplatin, metformin and mdivi-1.

Calculation of Pearson correlation coefficient 'r' did not detect any significant correlation with the exception of ECAR and cisplatin where  $r = -0.715$ ,  $p = 0.0462$

**Supplemental Figure 5. Expression of mitochondrial and metabolic regulatory proteins in malignant mesothelioma.**

Representative immunoblots showing expression of indicated mitochondrial and metabolic regulatory proteins in a panel of mesothelioma cell lines and a control transformed but non-tumorigenic cell line, MeT-5A.

**Supplemental Figure 1. . Fractal Dimension and Lacunarity analysis of duplicate tumor samples**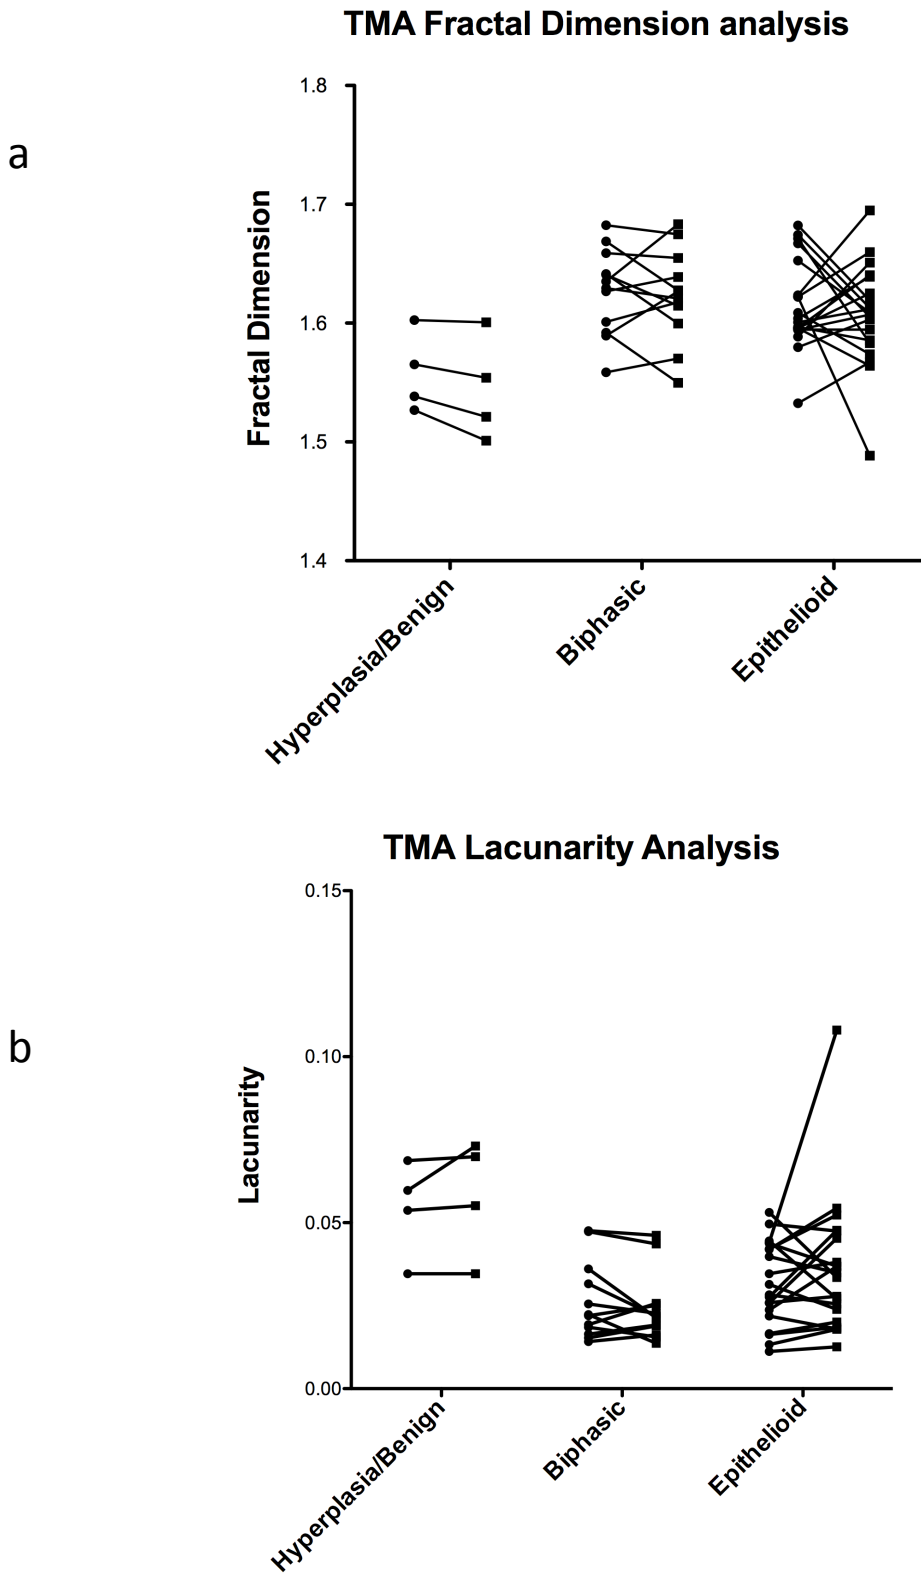

## Supplemental Figure 2. ROC analysis of Fractal dimension classifier

### a) Biphasic Mesothelioma from benign by Fractal Dimension

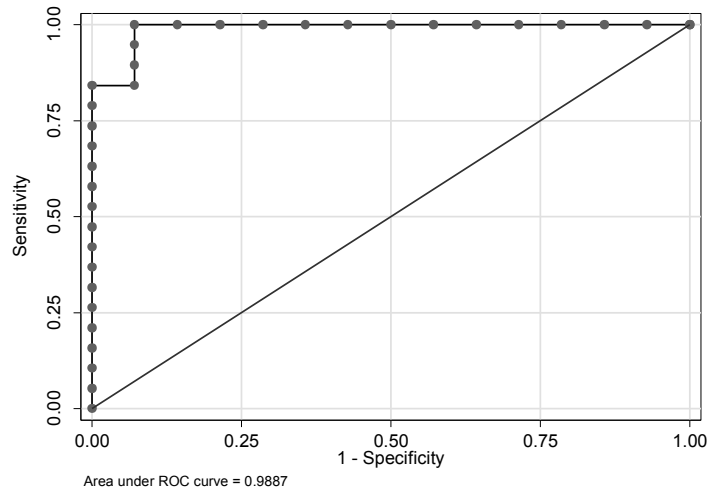

| Cutoff            | Sens    | Spec   | correctly classified |
|-------------------|---------|--------|----------------------|
| ( $\geq 1.5644$ ) | 100.00% | 92.86% | 96.97%               |

### b) Epithelioid Mesothelioma from benign by Fractal Dimension

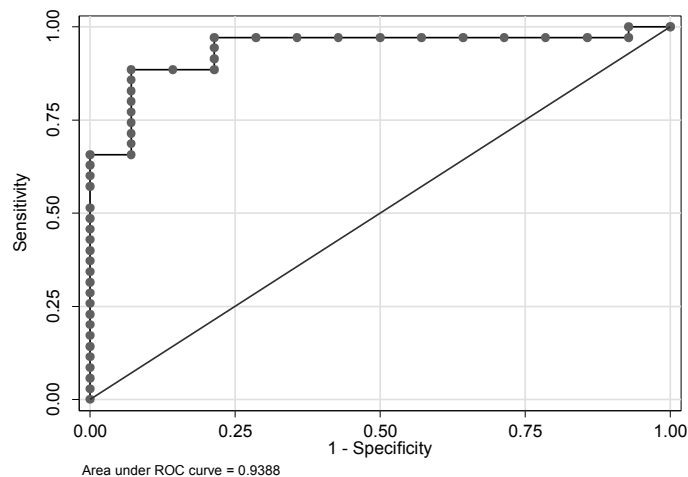

| Cutoff            | Sens   | Spec   | correctly classified |
|-------------------|--------|--------|----------------------|
| ( $\geq 1.5426$ ) | 97.14% | 78.57% | 91.84%               |

### Supplemental Figure 3. ROC analysis of Lacunarity classifier

#### a) Benign from Biphasic Mesothelioma by Lacunarity

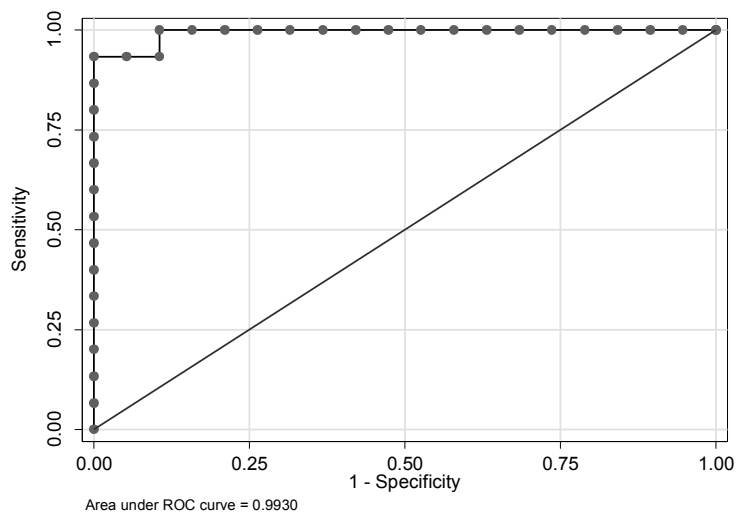

| Cutoff           | Sens   | Spec    | correctly classified |
|------------------|--------|---------|----------------------|
| ( $\geq .0518$ ) | 93.33% | 100.00% | 97.06%               |

#### b) Benign from Epithelioid Mesothelioma by Lacunarity

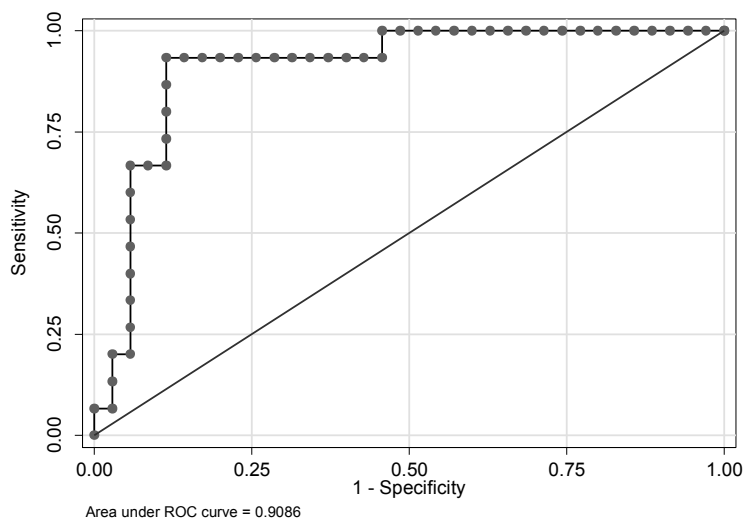

| Cutoff           | Sens   | Spec   | correctly classified |
|------------------|--------|--------|----------------------|
| ( $\geq .0518$ ) | 93.33% | 88.57% | 90.00%               |

## Supplementary Data – Figure 4. Scatter plots of a)OCR and b)ECAR with inhibitor EC50 values

a)

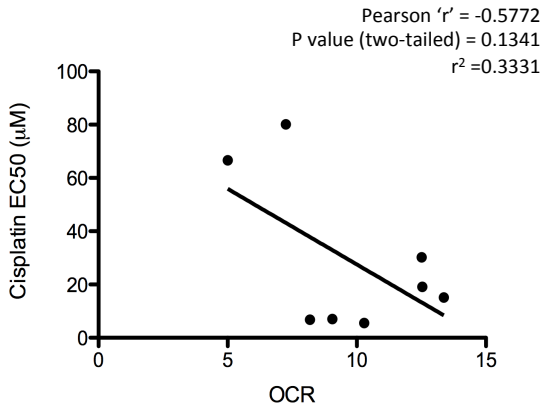

b)

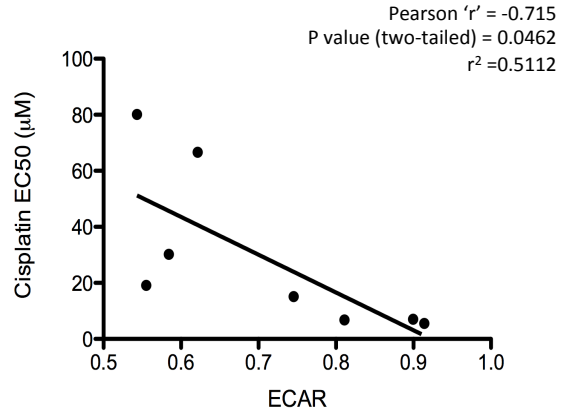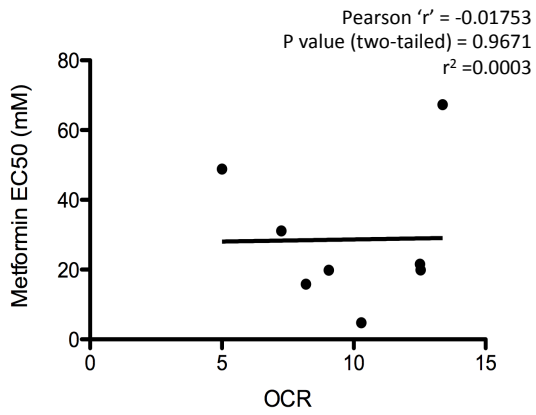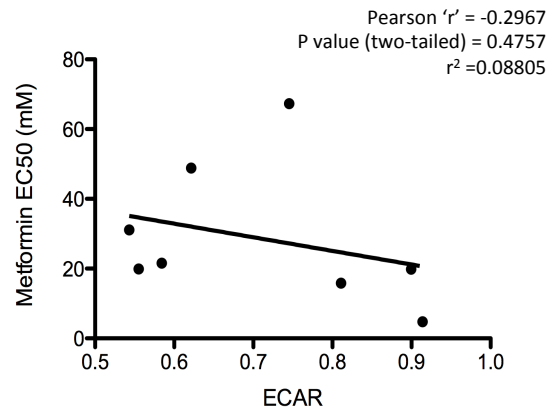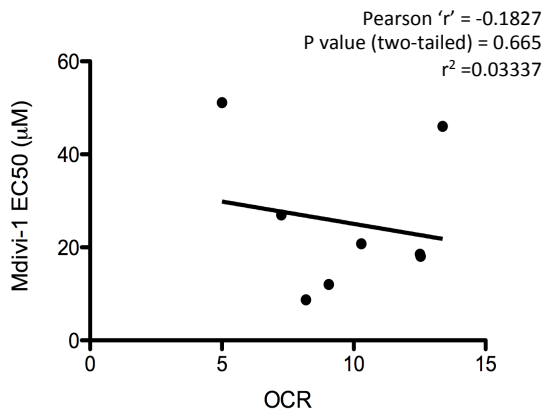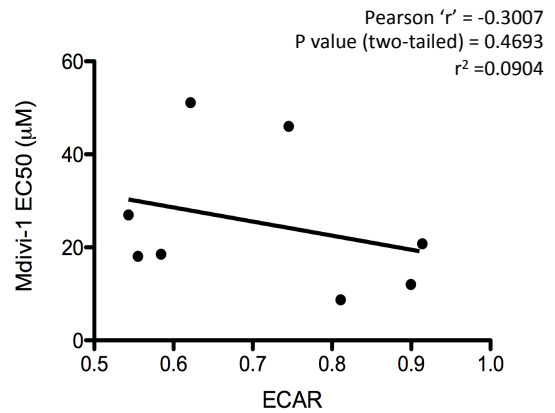

Supplement: srep24578-s1.pdf [file srep24578-s1.pdf]
